# Supplementary material
Source: HighWire-hosted journal article supplement (https://bmjopen.bmj.com/content/10/1/e031765)
Supplement: inline-supplementary-material-1 [file inline-supplementary-material-1.pdf]

## Appendix 1

The following organisations invited their membership to participate:

| <b>Organisation</b>                                  | <b>Method of invitation</b>       |
|------------------------------------------------------|-----------------------------------|
| The Royal College of Emergency Medicine              | Newsletter, social media, website |
| The Royal College of General Practitioners           | Newsletter                        |
| The Royal College of Paediatrics and Child Health    | Newsletter                        |
| The Royal College of Surgeons England                | Newsletter, social media          |
| The Royal College of Physicians London               | Newsletter                        |
| The Royal Society of Medicine                        | Newsletter, social media          |
| The Royal Medical Benevolent Fund                    | Social media                      |
| Association of Surgeons in Training                  | Website                           |
| Association of Surgeons of Great Britain and Ireland | Newsletter                        |
| Society for Acute Medicine                           | Newsletter                        |
| The British Medical Journal                          | Interview feature (Careers)       |
| British Geriatric Society                            | Website, social media             |
| The Pathological Society                             | Email invitation                  |
| Association of Palliative Medicine                   | Newsletter                        |
| Medimonkey                                           | Social media                      |
| Twitter: @QolcareG                                   | Social media                      |

\*The methods used to promote the study mean that an unknown number of potential participants were invited to participate.
